# Supplementary material for: Optimization of ultrasound-assisted extraction and biological activities of Crataegus monogyna Jacq. flowering branches using experimental design and artificial neural networks
Source: Royal Society of Chemistry journal article supplement (doi:10.1039/d6ra03013k), 2026-05-26
Supplement: d6ra03013k1.pdf [file d6ra03013k1.pdf]

## **Optimization of ultrasound-assisted extraction and biological activities of *Crataegus monogyna* Jacq. flowering branches using experimental design and artificial neural networks**

**Sengul Uysal<sup>1,2\*</sup>, Aleksandra Cvetanović Kljakić<sup>3</sup>, Biljana Lončar<sup>3</sup>, Gokhan Zengin<sup>4</sup>, Ugur Cakilcioglu<sup>5</sup>**

<sup>1</sup>Erciyes University, Halil Bayraktar Health Services Vocational College, Kayseri, Türkiye

<sup>2</sup>Erciyes University, Drug Application and Research Center, 38280, Kayseri, Türkiye

<sup>3</sup>Faculty of Technology Novi Sad, University of Novi Sad, 21000, Novi Sad, Serbia

<sup>4</sup>Selcuk University, Department of Biology, Science Faculty, Konya, Turkey

<sup>5</sup>Munzur University, Pertek Sakine Genç Vocational School, Pertek, Tunceli, Turkey

\*Corresponding author: Dr. Sengul UYSAL (senguluysal@erciyes.edu.tr)

### **Total phenolic and flavonoid content**

The total phenolic content was determined by employing the Folin-Ciocalteu method. Sample solution (1 mg/mL; 0.25 mL) was mixed with diluted Folin–Ciocalteu reagent (1 mL, 1:9, v/v) and shaken vigorously. After 3 min, Na<sub>2</sub>CO<sub>3</sub> solution (0.75 mL, 1%) was added and the sample absorbance was read at 760 nm after a 2 h incubation at room temperature. The total phenolic content was expressed as milligrams of gallic acid equivalents (mg GAE/g extract)

The total flavonoids content was determined using AlCl<sub>3</sub> method. Briefly, sample solution (1 mg/mL; 1 mL) was mixed with the same volume of aluminum trichloride (2%) in methanol. Similarly, a blank was prepared by adding sample solution (1 mL) to methanol (1 mL) without AlCl<sub>3</sub>. The sample and blank absorbances were read at 415 nm after a 10 min incubation at room temperature. The absorbance of the blank was subtracted from that of the sample. Rutin was used as a reference standard and the total flavonoid content was expressed as milligrams of rutin equivalents (mg RE/g extract).

### **Antioxidant and Enzyme Inhibition assays**

Antioxidant (DPPH and ABTS radical scavenging, reducing power (CUPRAC and FRAP)) tyrosinase (dopachrome method), and  $\alpha$ -amylase (iodine/potassium iodide method) were determined.

For the DPPH (1,1-diphenyl-2-picrylhydrazyl) radical scavenging assay: Sample solution (1 mg/mL; 1 mL) was added to 4 mL of a 0.004% methanol solution of DPPH. The sample absorbance was read at 517 nm after a 30 min incubation at room temperature in the dark. DPPH radical scavenging activity was expressed as millimoles of trolox equivalents (mg TE/g extract).

For ABTS (2,20 -azino-bis(3-ethylbenzothiazoline) 6-sulfonic acid) radical scavenging assay: Briefly, ABTS<sup>+</sup> was produced directly by reacting 7 mM ABTS solution with 2.45 mM potassium persulfate and allowing the mixture to stand for 12–16 in the dark at room temperature. Prior to beginning the assay, ABTS solution was diluted with methanol to an absorbance of  $0.700 \pm 0.02$  at 734 nm. Sample solution (1 mg/mL; 1 mL) was added to ABTS solution (2 mL) and mixed. The sample absorbance was read at 734 nm after a 30 min incubation at room temperature. The ABTS radical scavenging activity was expressed as millimoles of trolox equivalents (mmol TE/g extract).

For CUPRAC (cupric ion reducing activity) activity assay: Sample solution (1 mg/mL; 0.5 mL) was added to premixed reaction mixture containing  $\text{CuCl}_2$  (1 mL, 10 mM), neocuproine (1 mL, 7.5 mM) and  $\text{NH}_4\text{Ac}$  buffer (1 mL, 1 M, pH 7.0). Similarly, a blank was prepared by adding sample solution (0.5 mL) to premixed reaction mixture (3 mL) without  $\text{CuCl}_2$ . Then, the sample and blank absorbances were read at 450 nm after a 30 min incubation at room temperature. The absorbance of the blank was subtracted from that of the sample. CUPRAC activity was expressed as milligrams of trolox equivalents (mg TE/g extract).

For FRAP (ferric reducing antioxidant power) activity assay: Sample solution (1 mg/mL; 0.1 mL) was added to premixed FRAP reagent (2 mL) containing acetate buffer (0.3 M, pH 3.6), 2,4,6-tris(2-pyridyl)-S-triazine (TPTZ) (10 mM) in 40 mM HCl and ferric chloride (20 mM) in a ratio of 10:1:1 (v/v/v). Then, the sample absorbance was read at 593 nm after a 30 min incubation at room temperature. FRAP activity was expressed as milligrams of trolox equivalents (mg TE/g extract).

For Tyrosinase inhibitory activity assay: Sample solution (1 mg/mL; 25  $\mu\text{L}$ ) was mixed with tyrosinase solution (40  $\mu\text{L}$ , Sigma) and phosphate buffer (100  $\mu\text{L}$ , pH 6.8) in a 96-well microplate and incubated for 15 min at 25°C. The reaction was then initiated with the addition of L-DOPA (40  $\mu\text{L}$ , Sigma). Similarly, a blank was prepared by adding sample solution to all reaction reagents without enzyme (tyrosinase) solution. The sample and blank absorbances were read at 492 nm after a 10 min incubation at 25°C. The absorbance of the blank was subtracted from that of the sample and the tyrosinase inhibitory activity was expressed as kojic acid equivalents (mgKAE/g extract).

For  $\alpha$ -amylase inhibitory activity assay: Sample solution (1 mg/mL; 25  $\mu\text{L}$ ) was mixed with  $\alpha$ -amylase solution (ex-porcine pancreas, EC 3.2.1.1, Sigma) (50  $\mu\text{L}$ ) in phosphate buffer (pH 6.9 with 6 mM sodium chloride) in a 96-well microplate and incubated for 10 min at 37°C. After pre-incubation, the reaction was initiated with the addition of starch solution (50  $\mu\text{L}$ , 0.05%). Similarly, a blank was prepared by adding sample solution to all reaction reagents without enzyme ( $\alpha$ -amylase) solution. The reaction mixture was incubated 10 min at 37°C. The reaction was then stopped with the addition of HCl (25  $\mu\text{L}$ , 1 M). This was followed by addition of the iodine-potassium iodide solution (100  $\mu\text{L}$ ). The sample and blank absorbances were read at 630 nm. The absorbance of the blank was subtracted from that of the sample and the  $\alpha$ -amylase inhibitory activity was expressed as acarbose equivalents (mmol ACE/g extract).

**Table S1.** ANN1 model summary (performance and errors), for training, and testing cycles for Yeild

| Net. name | Train perf. | Test perf. | Valid perf. | Train error | Test error | Valid error | Training algorithm | Error function | Hidden activation | Output activation |
|-----------|-------------|------------|-------------|-------------|------------|-------------|--------------------|----------------|-------------------|-------------------|
| MLP 4-5-1 | 0.996       | 0.987      | 0.998       | 0.058       | 0.083      | 0.027       | BFGS 167           | SOS            | Logistic          | Identity          |

**Table S2.** The weight coefficients and biases  $W_1$  and  $B_1$  for ANN1.

|       | 1      | 2      | 3      | 4      | 5      |
|-------|--------|--------|--------|--------|--------|
| C     | -1.578 | -1.455 | -4.045 | 11.013 | -1.070 |
| t     | -1.804 | 0.837  | 1.481  | -1.925 | -3.251 |
| T     | 4.937  | 0.349  | -4,240 | 5.669  | -4.428 |
| Ratio | -1.092 | -1.603 | 4.229  | 0.552  | -0.389 |
| Bias  | 5.422  | -2.432 | 5.694  | 8.065  | 4.864  |

**Table S3.** The weight coefficients and biases  $W_2$  and  $B_2$  for ANN1.

|       | 1      | 2     | 3     | 4     | 5      | Bias  |
|-------|--------|-------|-------|-------|--------|-------|
| Yeild | -3.085 | -3.47 | 0.651 | 0.644 | -0.466 | 2.891 |

**Table S4.** ANN2 model summary (performance and errors), for training, and testing cycles for total phenolic

| Net. name | Train perf. | Test perf. | Valid perf. | Train error | Test error | Valid error | Train algorithm | Error function | Hidden activation | Output activation |
|-----------|-------------|------------|-------------|-------------|------------|-------------|-----------------|----------------|-------------------|-------------------|
| MLP 4-6-1 | 0.900       | 0.977      | 0.993       | 2.437       | 0.338      | 1.724       | BFGS 51         | SOS            | Exponential       | Logistic          |

**Table S5.** The weight coefficients and biases  $W_1$  and  $B_1$  for ANN2.

|       | 1      | 2      | 3      | 4      | 5      | 6      |
|-------|--------|--------|--------|--------|--------|--------|
| C     | 0.462  | 4.716  | 1.084  | 0.388  | -3.932 | 3.683  |
| t     | 2.123  | -0.686 | 1.607  | -5.298 | -0.639 | -3.312 |
| T     | 1.579  | -0.870 | -2,893 | 0.805  | 2.160  | 2.285  |
| Ratio | -2.542 | -5.450 | -2.659 | -4.445 | -6.662 | -6.697 |
| Bias  | -2.649 | -0.333 | -0.458 | 1.079  | 2.255  | -0.399 |

**Table S6.** The weight coefficients and biases  $W_2$  and  $B_2$  for ANN2.

|                | 1      | 2     | 3      | 4     | 5     | 6      | Bias   |
|----------------|--------|-------|--------|-------|-------|--------|--------|
| Total phenolic | -0.741 | 0.726 | -2.023 | 1.896 | 1.409 | -1.574 | -0.196 |

**Table S7.** ANN3 model summary (performance and errors), for training, and testing cycles for total flavonoid

| Net. name | Train perf. | Test perf. | Valid perf. | Train error | Test error | Valid error | Train algorithm | Error function | Hidden activation | Output activation |
|-----------|-------------|------------|-------------|-------------|------------|-------------|-----------------|----------------|-------------------|-------------------|
| MLP 4-8-1 | 0.812       | 0.806      | 0.848       | 23.067      | 18.770     | 18.236      | BFGS 22         | SOS            | Exponential       | Identity          |

**Table S8.** The weight coefficients and biases  $W_1$  and  $B_1$  for ANN3.

|       | 1      | 2      | 3      | 4      | 5      | 6      | 7      | 8      |
|-------|--------|--------|--------|--------|--------|--------|--------|--------|
| C     | 2.215  | 0.120  | 0.432  | 0.976  | 0.039  | 0.368  | -1.169 | 1.225  |
| t     | -0.964 | 0.439  | -0.075 | -0.349 | 0.319  | -0.139 | 0.954  | -0.384 |
| T     | -0.57  | -0.425 | -0.196 | -0.483 | -0.238 | -0.389 | 0.136  | -0.348 |
| Ratio | -0.267 | 0.734  | -0.394 | 0.284  | 0.953  | 0.272  | 0.486  | -0.067 |
| Bias  | 0.062  | -0.018 | 0.010  | 0.049  | -0.077 | 0.113  | -0.566 | 0.280  |

**Table S9.** The weight coefficients and biases  $W_2$  and  $B_2$  for ANN3.

|                 | 1      | 2      | 3      | 4     | 5      | 6     | 7     | 8     | Bias   |
|-----------------|--------|--------|--------|-------|--------|-------|-------|-------|--------|
| Total flavonoid | -0.317 | -0.246 | -0.432 | 0.529 | -0.276 | 0.215 | 0.407 | 0.645 | -0.062 |

**Table S10.** ANN4 model summary (performance and errors), for training, and testing cycles for DPPH

| Net. name | Train perf. | Test perf. | Valid perf. | Train error | Test error | Valid error | Train algorithm | Error function | Hidden activation | Output activation |
|-----------|-------------|------------|-------------|-------------|------------|-------------|-----------------|----------------|-------------------|-------------------|
| MLP 4-7-1 | 0.889       | 0.922      | 0.985       | 32.434      | 30.856     | 3.086       | BFGS 56         | SOS            | Exponential       | Logistic          |

**Table S11.** The weight coefficients and biases  $W_1$  and  $B_1$  for ANN4

|       | 1      | 2      | 3      | 4      | 5      | 6      | 7      |
|-------|--------|--------|--------|--------|--------|--------|--------|
| C     | 1.602  | -0.617 | -0.492 | 0.972  | -3.339 | -0.537 | -3.160 |
| t     | -0.206 | -0.163 | 1.342  | -0.426 | -1.917 | -2.269 | -0.809 |
| T     | -1.200 | 0.282  | 0.446  | -0.114 | 3.758  | 3.495  | 2.428  |
| Ratio | -0.821 | 1.203  | 0.331  | 0.074  | 1.946  | 1.119  | 4.622  |
| Bias  | -0.067 | -0.093 | -0.453 | -0.014 | 0.963  | 1.364  | -1.428 |

**Table S12.** The weight coefficients and biases  $W_2$  and  $B_2$  for ANN4.

|      | 1     | 2     | 3      | 4     | 5     | 6      | 7      | Bias   |
|------|-------|-------|--------|-------|-------|--------|--------|--------|
| DPPH | 1.083 | 1.108 | -0.300 | 0.183 | 0.423 | -0.119 | -0.366 | -1.387 |

**Table S13.** ANN5 model summary (performance and errors), for training, and testing cycles for ABTS

| Net. name | Train perf. | Test perf. | Valid perf. | Train error | Test error | Valid error | Training algorithm | Error function | Hidden activation | Output activation |
|-----------|-------------|------------|-------------|-------------|------------|-------------|--------------------|----------------|-------------------|-------------------|
| MLP 4-6-1 | 0.941       | 0.850      | 0.994       | 29.487      | 79.370     | 3.154       | BFGS 126           | SOS            | Exponential       | Exponential       |

**Table S14.** The weight coefficients and biases  $W_1$  and  $B_1$  for ANN5

|       | 1      | 2      | 3      | 4      | 5      | 6      |
|-------|--------|--------|--------|--------|--------|--------|
| C     | -0.892 | 5.564  | 0.661  | 2.038  | 2.388  | -4.213 |
| t     | 0.745  | -1.582 | -1.367 | -2.757 | -4.272 | 2.156  |
| T     | 1.114  | 4.762  | -0.451 | 1.026  | -2.476 | -2.447 |
| Ratio | 1.681  | 2.618  | -1.155 | 3.878  | -4.137 | 7.163  |
| Bias  | -0.462 | -4.262 | 0.938  | -1.123 | 1.853  | -1.590 |

**Table S15.** The weight coefficients and biases  $W_2$  and  $B_2$  for ANN5.

|      | 1     | 2      | 3     | 4      | 5      | 6      | Bias   |
|------|-------|--------|-------|--------|--------|--------|--------|
| ABTS | 0.195 | -0.005 | 1.342 | -0.011 | -0.559 | -0.008 | -1.875 |

**Table S16.** ANN6 model summary (performance and errors), for training, and testing cycles for CUPRAC

| Net. name  | Train perf. | Test perf. | Valid perf. | Train error | Test error | Valid error | Train algorithm | Error function | Hidden activation | Output activation |
|------------|-------------|------------|-------------|-------------|------------|-------------|-----------------|----------------|-------------------|-------------------|
| MLP 4-10-1 | 0.836       | 0.752      | 0.817       | 50.434      | 100.834    | 52.903      | BFGS 148        | SOS            | Tanh              | Exponential       |

**Table S17.** The weight coefficients and biases  $W_1$  and  $B_1$  for ANN6

|   | 1      | 2     | 3      | 4      | 5     | 6      | 7      | 8      | 9      | 10     |
|---|--------|-------|--------|--------|-------|--------|--------|--------|--------|--------|
| C | -1.472 | 1.546 | -1.178 | -1.140 | 1.393 | -0.604 | -6.021 | -0.358 | -0.466 | -0.604 |

|       |        |        |        |       |        |        |        |        |        |       |
|-------|--------|--------|--------|-------|--------|--------|--------|--------|--------|-------|
| t     | -2.579 | -1.017 | 5.205  | 0.653 | -6.401 | -4.669 | -1.915 | 2.055  | -1.191 | 2.912 |
| T     | 2.958  | 0.392  | 2.706  | 3.477 | 5.578  | 8,408  | 8.040  | 0.157  | 0.680  | 0.560 |
| Ratio | -1.440 | -2.876 | 5.052  | 4.337 | -2.653 | 5.967  | 7.933  | -0.209 | 0.886  | 1.826 |
| Bias  | -1.435 | 1.387  | -1.159 | 1.187 | 3.902  | -6.959 | -2.972 | -0.615 | -0.783 | 1.254 |

**Table S18.** The weight coefficients and biases  $W_2$  and  $B_2$  for ANN6.

|        |       |        |       |        |       |        |        |        |       |       |
|--------|-------|--------|-------|--------|-------|--------|--------|--------|-------|-------|
|        | 1     | 2      | 3     | 4      | 5     | 6      | 7      | 8      | 9     | 10    |
| CUPRAC | 4.257 | -2.956 | 4.066 | -2.193 | 2.347 | -1.898 | -1.107 | -0.323 | 0.123 | 1.333 |

**Table S19.** ANN7 model summary (performance and errors), for training, and testing cycles for FRAP

| Net. name | Train perf. | Test perf. | Valid perf. | Train error | Test error | Valid error | Train algorithm | Error function | Hidden activation | Output activation |
|-----------|-------------|------------|-------------|-------------|------------|-------------|-----------------|----------------|-------------------|-------------------|
| MLP 4-4-1 | 0.634       | 0.682      | 0.994       | 89.654      | 124.955    | 158.057     | BFGS 19         | SOS            | Logistic          | Logistic          |

**Table S20.** The weight coefficients and biases  $W_1$  and  $B_1$  for ANN7

|       |        |        |        |        |
|-------|--------|--------|--------|--------|
|       | 1      | 2      | 3      | 4      |
| C     | 17.187 | 0.305  | 10.415 | -7.861 |
| t     | -2.343 | 0.339  | -1.579 | -1.155 |
| T     | 3.389  | -2.475 | 10.312 | 3.539  |
| Ratio | 12.265 | -0.192 | -5.997 | -5.403 |
| Bias  | -0.620 | 0.232  | -2.684 | -0.877 |

**Table S21.** The weight coefficients and biases  $W_2$  and  $B_2$  for ANN7.

|      |       |       |       |        |        |
|------|-------|-------|-------|--------|--------|
|      | 1     | 2     | 3     | 4      | Bias   |
| FRAP | 2.695 | 1.451 | 2.714 | -0.267 | -0.507 |

**Table S22.** ANN8 model summary (performance and errors), for training, and testing cycles for  $\alpha$ -amylase

| Net. name | Train perf. | Test perf. | Valid perf. | Train error | Test error | Valid error | Train algorithm | Error function | Hidden activation | Output activation |
|-----------|-------------|------------|-------------|-------------|------------|-------------|-----------------|----------------|-------------------|-------------------|
| MLP 4-8-1 | 0.808       | 0.812      | 0.933       | 0.001       | 0.001      | 0.001       | BFGS 91         | SOS            | Exponential       | Exponential       |

**Table S23.** The weight coefficients and biases  $W_1$  and  $B_1$  for ANN8

|       | 1      | 2      | 3      | 4      | 5      | 6      | 7      | 8      |
|-------|--------|--------|--------|--------|--------|--------|--------|--------|
| C     | -4.089 | -0.720 | 1.795  | 4.750  | 0.120  | 0.136  | 7.297  | 3.820  |
| t     | 0.051  | -0.303 | 0.048  | 0.041  | -0.268 | -0.173 | 0.033  | -0.077 |
| T     | -0.131 | 0.415  | 0.712  | -0.197 | 0.403  | -0.065 | -0.214 | -0.720 |
| Ratio | 0.123  | -0.213 | -0.138 | 0.002  | -0.114 | -0.178 | -0.077 | -0.877 |
| Bias  | 0.313  | -0.179 | 0.463  | 0.348  | -0.835 | -0.549 | -1.463 | 0.685  |

**Table S24.** The weight coefficients and biases  $W_2$  and  $B_2$  for ANN8.

|                       | 1      | 2      | 3      | 4      | 5      | 6      | 7     | 8      | Bias  |
|-----------------------|--------|--------|--------|--------|--------|--------|-------|--------|-------|
| $\alpha$ -<br>amylase | -3.311 | -1.755 | -0.116 | -0.387 | -1.168 | -0.652 | 0.196 | -0.099 | 6.570 |

**Table S25.** ANN9 model summary (performance and errors), for training, and testing cycles for Tyrosinase

| Net. name | Train perf. | Test perf.       | Valid perf. | Train error | Test error | Valid error | Train algorithm | Error function | Hidden activation | Output activation |
|-----------|-------------|------------------|-------------|-------------|------------|-------------|-----------------|----------------|-------------------|-------------------|
| MLP 4-6-1 | 0.813       | $\frac{0.76}{7}$ | 0.965       | 0.265       | 0.523      | 0.117       | BFGS 41         | SOS            | Logistic          | Logistic          |

**Table S26.** The weight coefficients and biases  $W_1$  and  $B_1$  for ANN9

|       | 1      | 2      | 3      | 4      | 5      | 6      |
|-------|--------|--------|--------|--------|--------|--------|
| C     | 1.587  | 5,166  | -0.418 | 0.672  | -0.154 | 2.104  |
| t     | -0.295 | -3.362 | 0.694  | -0.003 | 0.924  | -0.629 |
| T     | 10.716 | 7.683  | -1.636 | 1.497  | 2.052  | 2.454  |
| Ratio | -6.618 | -0.791 | 0.691  | -1.349 | -1.924 | -1.786 |
| Bias  | -0.430 | 2.217  | 1.972  | -0.066 | -0.148 | -0.921 |

**Table S27.** The weight coefficients and biases  $W_2$  and  $B_2$  for ANN9.

|            | 1      | 2     | 3      | 4     | 5     | 6     | Bias   |
|------------|--------|-------|--------|-------|-------|-------|--------|
| Tyrosinase | -3.984 | 3.173 | -2.639 | 1.274 | 1.644 | 2.042 | -0.888 |

**Table S28.** The "goodness of fit" for the observed ANN models

|                   | $\chi^2$ | RMSE  | MBE    | MPE   | $r^2$ |
|-------------------|----------|-------|--------|-------|-------|
| Yeild             | 0.017    | 0.128 | 0.008  | 0.197 | 0.994 |
| TPC               | 0.365    | 0.596 | 0.016  | 0.194 | 0.948 |
| TFC               | 4.685    | 2.136 | 0.078  | 1.185 | 0.779 |
| DPPH              | 5.007    | 2.208 | -0.101 | 0.163 | 0.929 |
| ABTS              | 4.302    | 2.047 | -0.144 | 0.131 | 0.972 |
| CUPRAC            | 3.541    | 1.857 | 0.221  | 0.149 | 0.944 |
| FRAP              | 36.884   | 5.994 | -0.364 | 0.541 | 0.558 |
| $\alpha$ -amylase | 0.000    | 0.013 | 0.004  | 0.814 | 0.891 |
| Tyrosinase        | 0.159    | 0.393 | 0.102  | 0.189 | 0.694 |
